# Supplementary material for: The landscape configuration of zoonotic transmission of Ebola virus disease in West and Central Africa: interaction between population density and vegetation cover
Source: PeerJ. 2015 Jan 20;3:e735. doi: 10.7717/peerj.735 (PMC4304850; doi:10.7717/peerj.735)
Supplement: Supplemental Information 2 [file peerj-03-735-s002.xlsx]

## Sheet: Data
Year	Virus	Geographiclocation	Longitude	Latitude	zoonosis
1976	SEBOV	Nzara, Sudan	28.2486	4.63303	yes
1976	ZEBOV	Yambuku, Zaire	18.2568	0.045274	yes
1977	ZEBOV	Bonduni, Zaire	19.2126	2.92331	yes
1979	SEBOV	Nzara, Sudan	28.2486	4.63303	yes
1994	CIEBOV	Taï National Park, Côte d'Ivoire	-6.93944	5.69	yes
1994–1995	ZEBOV	Mekouka, Gabon	12.9833	1.4	yes
1994–1995	ZEBOV	Andock, Gabon	12.9166	1.4833	yes
1995	ZEBOV	Kikwit, Zaire	18.8162	-5.04098	yes
1996	ZEBOV	Mayibout 2, Gabon	13.1	1.1166	yes
1996–1997	ZEBOV	Booue	11.95	0.1	yes
2000–2001	SEBOV	Rwot, Gulu District, Uganda	32.4825	3.13694	yes
2001-2002	ZEBOV	Etakangaye, La Zadie District, Gabon	13.9667	1.01667	yes
2001–2002	ZEBOV	Oloba, Mbomo District, Congo	14.3494	0.648611	yes
2001–2002	ZEBOV	Ekata, Gabon	14.3103	0.683333	yes
2001–2002	ZEBOV	Abolo, Ewo District, Congo	15.0242	-1.05833	yes
2001–2002	ZEBOV	Entsiami, Kelle District, Congo	14.2278	0.124722	yes
2001–2002	ZEBOV	Ambomi, Kelle District, Congo	14.6592	-0.319444	yes
2001–2002	ZEBOV	Grand Etoumbi, Mbomo, Congo	14.6792	0.494444	yes
2002-2003	ZEBOV	Yembelangoye, Kelle District, Congo	14.3453	-0.19	yes
2002-2003	ZEBOV	Mvoula, Mbomo, Congo	15.6025	0.194444	yes
2003–2004	ZEBOV	Mbandza, Congo	15.3844	-0.598333	yes
2004	SEBOV	Yambio County, Sudan	28.3836	4.57548	yes
2005	ZEBOV	Odzala National Park, Congo	14.8383	0.891944	yes
2007	ZEBOV	Mombo Mounene, Kasai Occidental Province, Democratic Republic of the Congo	21.3567	-5.16861	yes
2007–2008	BDBV	Kabango,Bundibugyo District, Uganda	30.1167	0.766667	yes
2008–2009	ZEBOV	Luebo, Kasai Occidental Province, Democratic Republic of the Congo	21.4217	-5.35194	yes
2011	SEBOV	Luweero District, Uganda (Nakisamata, no coordinates)	32.4994	0.83306	yes
2012	SEBOV	Nyamarunda subcounty,Kibaale District, Western Uganda (Nyanswiga Catholic Church)	30.5042	0.561496	yes
2012	BDBV	Isiro, Orientale Province, Democratic Republic of the Congo	27.6158	2.77389	yes
2012-2013	SEBOV	Luweero District, Uganda	32.4994	0.83306	yes
2014 (Dec 2013)	ZEBOV	Meliandou, Guéckédou prefecture (probable index case is here)	-10.0612	8.61607	yes
2014	ZEBOV	Inkanamongo, DRC	20.4333	-0.616667	yes
